# Supplementary material for: Lipid nanoparticle-targeted mRNA formulation as a treatment for ornithine-transcarbamylase deficiency model mice
Source: PubMed Central journal article supplement — Mol Ther Nucleic Acids. 2023 Jul 4;33:210–26. doi: 10.1016/j.omtn.2023.06.023 (PMC10372164; doi:10.1016/j.omtn.2023.06.023), 2023-07-04
Supplement: mmc1.pdf [file mmc1.pdf]

OMTN, Volume 33

## **Supplemental information**

### **Lipid nanoparticle-targeted mRNA formulation as a treatment for ornithine-transcarbamylase deficiency model mice**

**Kazuto Yamazaki, Kenji Kubara, Satoko Ishii, Keita Kondo, Yuta Suzuki, Takayuki Miyazaki, Kaoru Mitsuhashi, Masashi Ito, and Kappei Tsukahara**

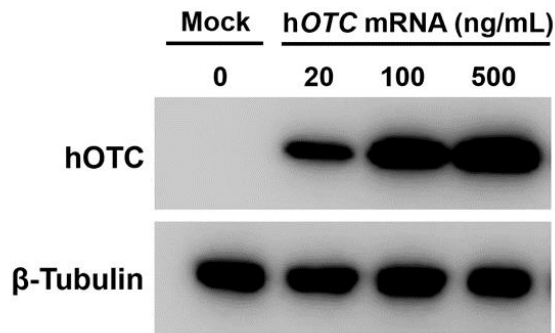

**Figure S1: Western blotting analysis of hOTC protein expression in Hep3B cells transfected with codon-optimized hOTC mRNA.** We used Lipofectamine MessengerMAX mRNA Transfection Reagent. For Mock, only the transfection reagent was added. β-Tubulin protein levels served as an internal control.

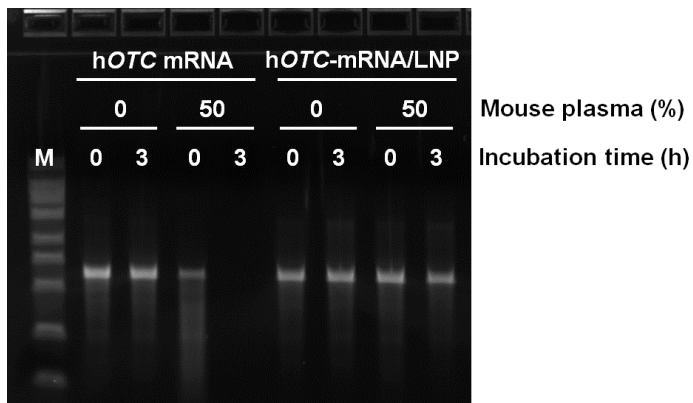

**Figure S2: The stability test of mRNA formulated in LNP.** hOTC mRNA and LNP-formulated hOTC mRNA (hOTC-mRNA/LNP) were incubated in the absence or presence of 50% mouse plasma from female BALB/c mice at 37 °C for 3 h. The samples were electrophoresed on a 1% agarose gel after immediately mixing with 50% mouse plasma (0 h). M, DynaMarker RNA High for Easy Electrophoresis (BioDynamics Laboratory, Tokyo, Japan).

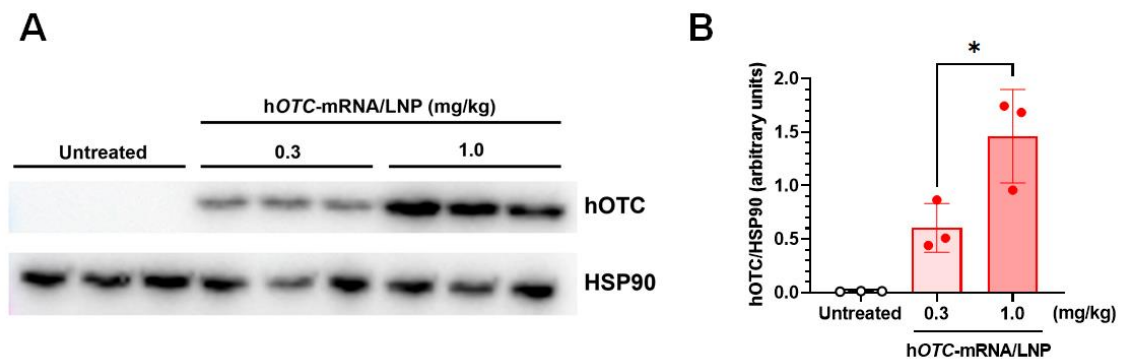

**Figure S3: A dose-dependent increase in hOTC protein expression by hOTC-mRNA/LNP.** Female BALB/c mice were intravenously injected with hOTC-mRNA/LNP at 0.3 or 1.0 mg/kg, and liver samples were harvested the next day. **(A)** Hepatic hOTC protein expression was analyzed by western blotting. HSP90 protein levels were used as an internal control. **(B)** The results of **A** were quantified. Values are expressed as means  $\pm$  SD with individual values (n =3). \* indicates  $p < 0.05$  by two-tailed unpaired Student's t-test.

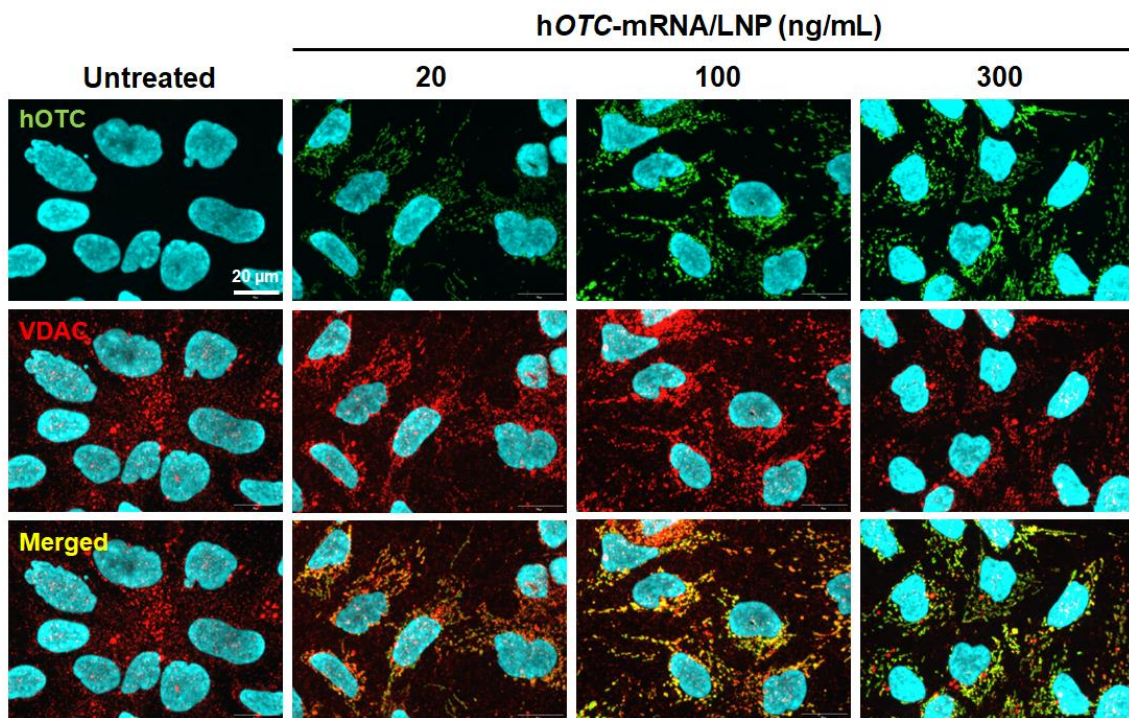

**Figure S4: Subcellular localization of hOTC proteins in Hep3B cells treated with hOTC-mRNA/LNP at 20, 100, or 300 ng/mL. VDAC, a mitochondrial marker. Scale bars are 20  $\mu$ m.**

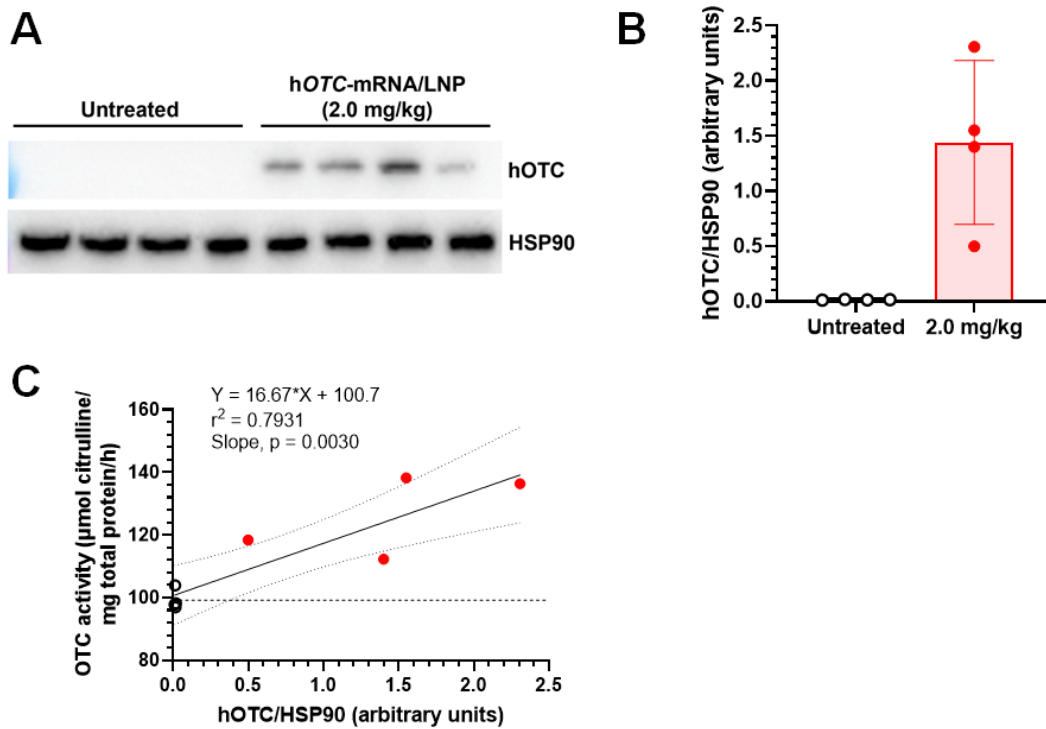

**Figure S5: Relationship between hOTC protein expression and OTC activity in the liver of female BALB/c mice intravenously injected with hOTC-mRNA/LNP at 2.0 mg/kg.** Liver specimens were harvested three days after the treatment. Untreated mice were used as a control. **(A)** Western blots of hepatic hOTC protein in untreated and hOTC-mRNA/LNP-treated mice. Heat shock protein 90 (HSP90) was used as an internal control. **(B)** Quantification of hOTC protein levels revealed by western blots in **A** are expressed relative to HSP90 protein levels. Values are expressed as means  $\pm$  SD with individual values. **(C)** Regression line between hepatic hOTC protein levels and OTC activity. Untreated, open white circles; hOTC-mRNA/LNP-treated, red-filled circles. The dotted lines indicate 95% confidence. The dashed line shows the mean of OTC activity of the untreated group. Untreated,  $n = 4$ ; treated,  $n = 4$ .

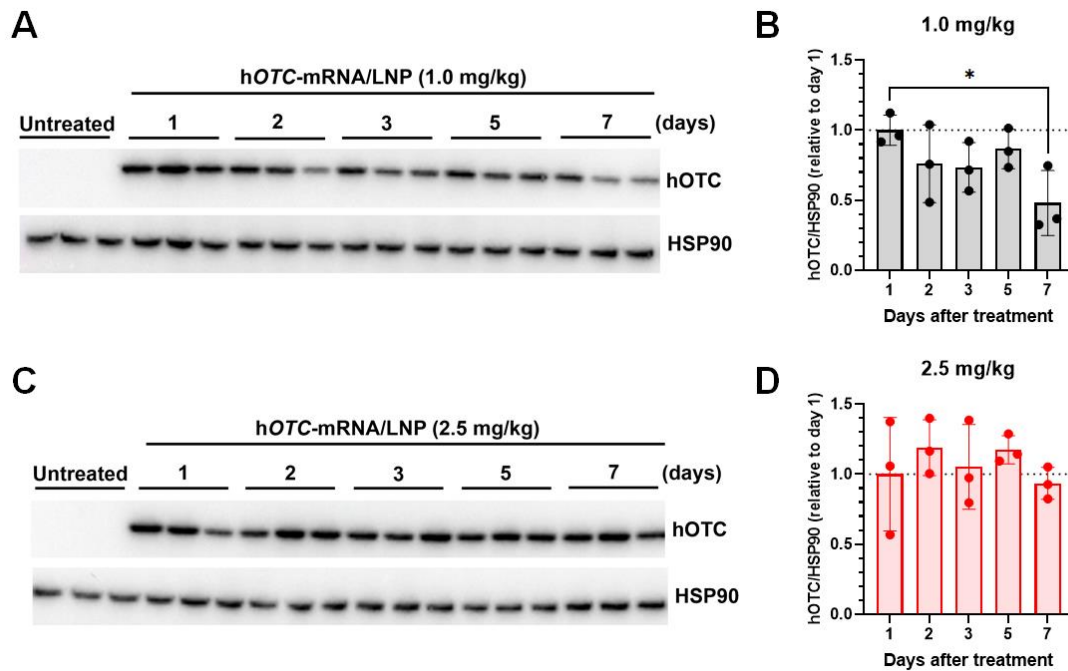

**Figure S6: Time-course changes of hepatic hOTC protein expression induced by hOTC-mRNA/LNP treatment.** Female BALB/c mice were intravenously injected with hOTC-mRNA/LNP at 1.0 or 2.5 mg/kg. Liver samples were collected 1, 2, 3, 5, and 7 days after the treatment. Untreated (UT) mice were used as a negative control for hOTC expression.  $n = 3$  per each time. Western blot analysis of hepatic hOTC protein expression of mice treated with hOTC-mRNA/LNP at 1.0 mg/kg (A and B) and 2.5 mg/kg (C and D). HSP90 protein levels were used as an internal control. Values are expressed as means  $\pm$  SD with individual values relative to those on day 1. Tukey's multiple comparisons test compared time-course changes of hOTC protein expression. \* indicates  $p < 0.05$ .

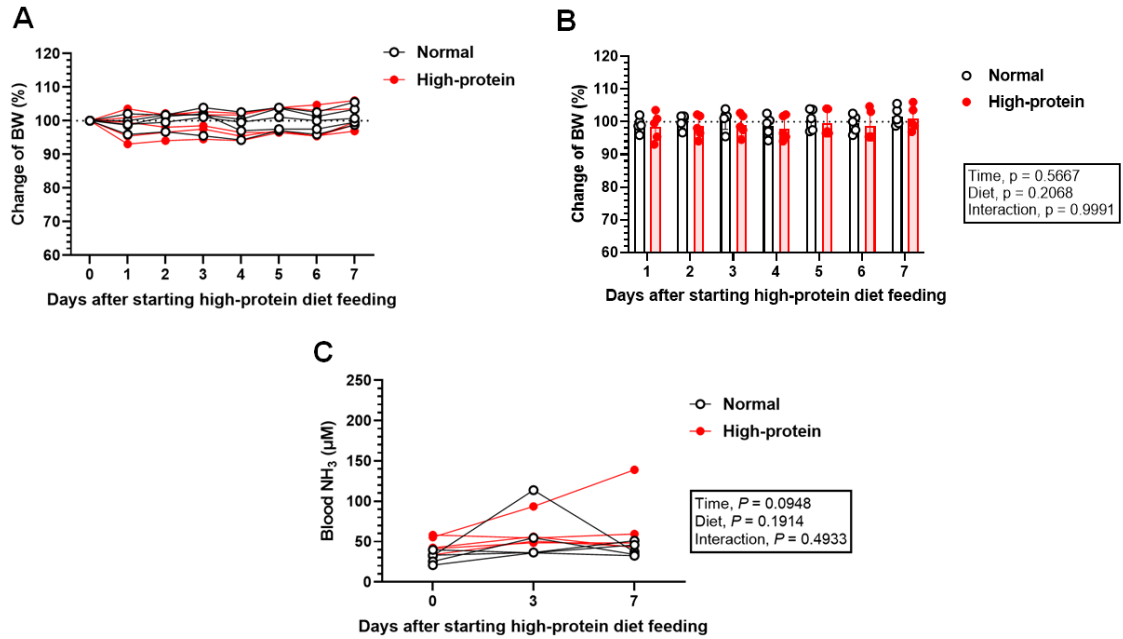

**Figure S7: Effects of a high-protein diet feeding on body weight and blood  $\text{NH}_3$  concentrations of wild-type male B6 mice.** We monitored body weight (BW) and blood  $\text{NH}_3$  concentrations of mice fed the high-protein diet (40%/kcal) or normal MF diet *ad libitum* from days 0 to 7. Blood was collected from the cheek vein to determine  $\text{NH}_3$  concentrations on days 0 (before the feeding of the high-protein diet), 3, and 7. **(A)** BW changes of individual mice (% of those on day 0). The dotted line indicates 100%. **(B)** Comparison of BW changes between normal and high-protein diet feeding from days 1 to 7. Data were analyzed by two-way ANOVA ( $F_{6,56} = 0.8099$ ,  $p = 0.5667$  for time;  $F_{1,56} = 1.631$ ,  $p = 0.2068$  for diet;  $F_{6,56} = 0.05883$ ,  $p = 0.9991$  for interaction). Values are expressed as means  $\pm$  SD with individual values. The dotted line indicates 100%. **(C)** Changes in blood  $\text{NH}_3$  levels of individual mice were analyzed by two-way repeated measures ANOVA ( $F_{1,885,15.08} = 2.800$ ,  $p = 0.0948$  for time;  $F_{1,8} = 2.037$ ,  $p = 0.1914$  for diet;  $F_{2,16} = 0.7387$ ,  $p = 0.4933$  for interaction).  $n = 5$  per group.

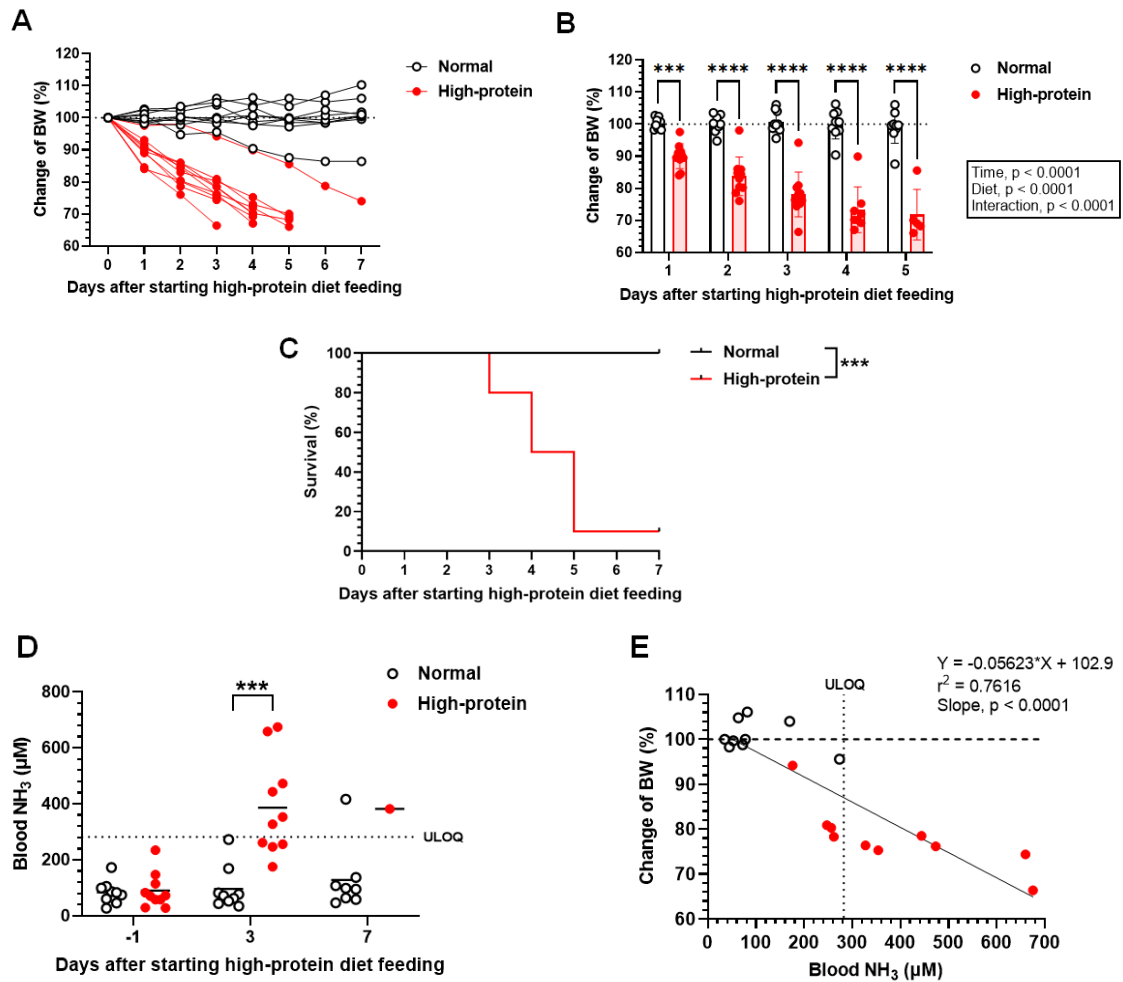

**Figure S8: Effects of a high-protein diet feeding on body weight, blood  $\text{NH}_3$  concentrations, and survival of male *Otc<sup>spf-ash</sup>* mice.** We measured body weight (BW) and blood  $\text{NH}_3$  concentrations of male *Otc<sup>spf-ash</sup>* mice fed the high-protein (40%/kcal) or normal diet *ad libitum* from day 0. Blood samples were drawn from the cheek vein to determine  $\text{NH}_3$  concentrations on days  $-1$ ,  $3$ , and  $7$ . **(A)** Time-course changes of BW of individual mice (% of those on day 0). The dotted line indicates 100%. **(B)** Comparison of BW changes between normal and high-protein diet feeding from days 1 to 5. Two-way ANOVA analyzed data ( $F_{4,78} = 9.684$ ,  $p < 0.0001$  for time;  $F_{1,78} = 341.5$ ,  $p < 0.0001$  for diet;  $F_{4,78} = 8.732$ ,  $p < 0.0001$  for interaction), followed by Šidák's multiple comparisons tests. \*\*\* and \*\*\*\* indicate  $p < 0.001$  and  $p < 0.0001$ , respectively. Values are expressed as means  $\pm$  SD with individual values. Dotted line indicates 100%. **(C)** Kaplan–Meyer survival curves of the normal and high-protein diet-fed groups. \*\*\* indicates  $p < 0.001$  by log-rank test. **(D)** Comparison of blood  $\text{NH}_3$  levels between normal and high-protein diet-fed mutant mice on days  $-1$ ,  $3$ , and  $7$ . Note that there are values of ULQ (upper limit of quantification) ( $282 \mu\text{M}$ ) (blood  $\text{NH}_3$  levels were



measured by diluting blood five times, but the values of 6 of 10 mice on day 3 exceeded the upper limit of measurement of the kit and then these values were for reference). \*\*\* indicates  $p < 0.001$  by Mann–Whitney's U-test. Values are expressed medians with individual values. (E) Relationship between blood  $\text{NH}_3$  concentrations and body weight changes on day 3. The dotted lines in D and E indicate the value of ULOQ. The dashed line in E shows 100%.  $n = 9\text{--}10$  per group.

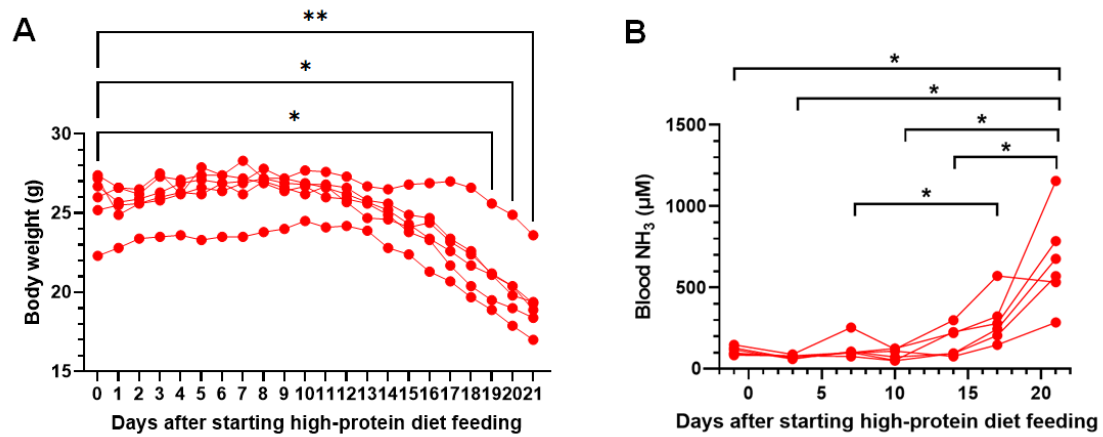

**Figure S9: *In vivo* efficacy of single dosing of hOTC-mRNA/LNP in OTC deficiency model mice.** We monitored body weight and blood NH<sub>3</sub> concentrations of male *Otc<sup>spf-ash</sup>* mice treated with hOTC-mRNA/LNP. Mice were administered an intravenous bolus of hOTC-mRNA/LNP at 3.0 mg/kg on day 0. After the injection, mice were provided a high-protein (40%/kcal) diet *ad libitum*. Blood was sampled from the cheek vein for NH<sub>3</sub> determination on days -1, 3, 7, 10, 14, 17, and 21. **(A)** Comparison of body weight change from day 0 in the hOTC-mRNA/LNP-treated group. Data were analyzed by one-way repeated measures ANOVA ( $p = 0.0004$ ), followed by Dunnett's multiple comparisons tests. \* and \*\* indicate  $p < 0.05$  and  $p < 0.01$ , respectively. **(B)** Time-course changes of blood NH<sub>3</sub> levels of hOTC-mRNA/LNP-treated mice. Data were analyzed by one-way repeated measures ANOVA ( $p = 0.0022$ ), followed by Tukey's multiple comparisons tests. \* indicates  $p < 0.05$ .  $n = 6$  per group.

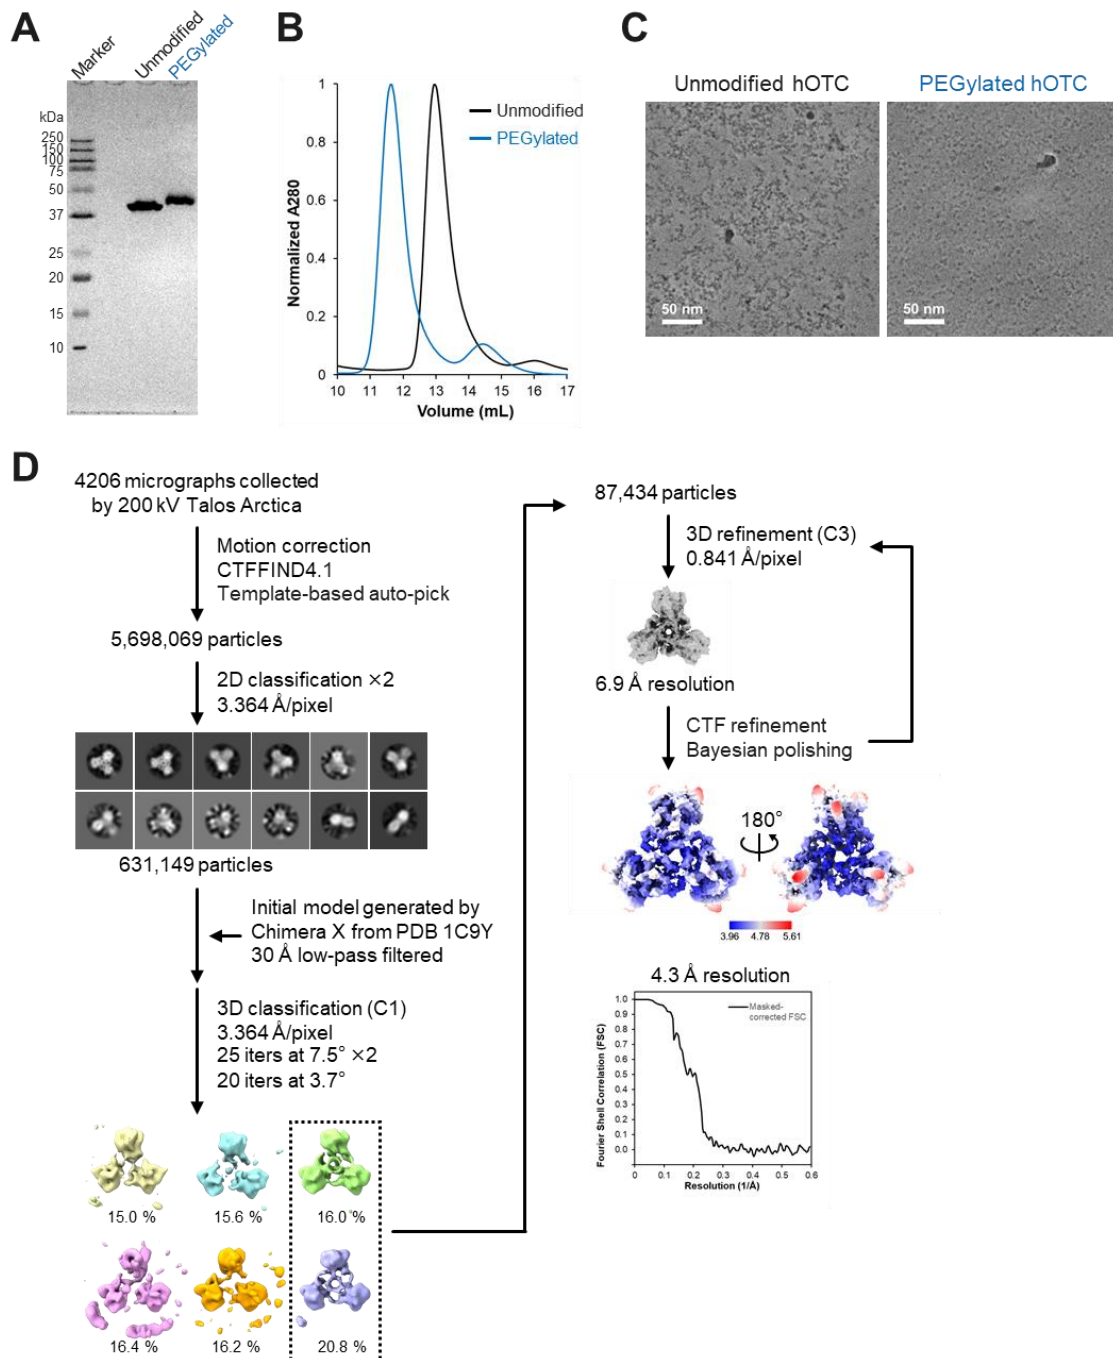

**Figure S10: Cryo-EM sample preparation and data processing of hOTC proteins.**

To improve the quality of verified cryo-EM samples, purified hOTC proteins were PEGylated with PEG8. The modification was confirmed by SDS-PAGE (A) and size-exclusion chromatography (B). (C) Comparison of the particle qualities of unmodified and PEGylated hOTC. (D) The workflow of cryo-EM data processing.

**Table S1: Physical properties of mRNA-formulating LNPs used in this study.**

| Formulated mRNA                                  | Z-average (nm) | Polydispersity index | mRNA encapsulation efficiency (%) |
|--------------------------------------------------|----------------|----------------------|-----------------------------------|
| Firefly luciferase ( <i>Fluc</i> )               | 114            | 0.02                 | 94%                               |
| human ornithine transcarbamylase ( <i>hOTC</i> ) | 125            | 0.02                 | 94%                               |

**Table S2: Plasma biochemistry of mice repeatedly dosed with LNP-formulated mRNA.**

|               | Saline (n = 4) | <i>Fluc</i> -mRNA/LNP (mg/kg) |             | <i>hOTC</i> -mRNA/LNP (mg/kg) |              |
|---------------|----------------|-------------------------------|-------------|-------------------------------|--------------|
|               |                | 0.3 (n = 4)                   | 1.0 (n = 4) | 0.3 (n = 4)                   | 1.0 (n = 4)  |
| AST (mU/mL)   | 97 ± 32        | 140 ± 59                      | 127 ± 41    | 126 ± 53                      | 170 ± 91     |
| ALT (mU/mL)   | 42 ± 12        | 65 ± 23                       | 74 ± 12     | 46 ± 7                        | 41 ± 3       |
| ALP (mU/mL)   | 140 ± 6        | 130 ± 23                      | 146 ± 17    | 152 ± 24                      | 137 ± 11     |
| T-Bil (mg/dL) | 0.04 ± 0.01    | 0.04 ± 0.01                   | 0.04 ± 0.01 | 0.05 ± 0.01                   | 0.06 ± 0.01  |
| UN (mg/dL)    | 26.1 ± 1.4     | 25.9 ± 1.5                    | 29.0 ± 3.8  | 21.3 ± 2.5                    | 23.0 ± 5.6   |
| CRNN (mg/dL)  | 0.08 ± 0.01    | 0.08 ± 0.01                   | 0.07 ± 0.01 | 0.07 ± 0.01                   | 0.08 ± 0.02  |
| T-P (g/dL)    | 4.5 ± 0.1      | 4.6 ± 0.2                     | 4.7 ± 0.2   | 4.6 ± 0.1                     | 4.8 ± 0.2    |
| Alb (g/dL)    | 3.1 ± 0.1      | 3.0 ± 0.1                     | 3.1 ± 0.2   | 3.1 ± 0.1                     | 3.2 ± 0.1    |
| Glo (g/dL)    | 1.4 ± 0.0      | 1.5 ± 0.1                     | 1.6 ± 0.1   | 1.5 ± 0.1                     | 1.7 ± 0.1*   |
| A/G           | 2.27 ± 0.08    | 1.99 ± 0.10                   | 1.96 ± 0.19 | 2.11 ± 0.17                   | 1.93 ± 0.13* |
| Glu (mg/dL)   | 242 ± 16       | 270 ± 23                      | 247 ± 32    | 251 ± 31                      | 228 ± 34     |
| T-Cho (mg/dL) | 77 ± 2         | 87 ± 6                        | 102 ± 7*    | 83 ± 11                       | 90 ± 10      |
| TG (mg/dL)    | 142 ± 31       | 199 ± 29                      | 144 ± 44    | 136 ± 53                      | 75 ± 16      |
| Ca (mg/dL)    | 8.6 ± 0.1      | 8.9 ± 0.5                     | 9.1 ± 0.3   | 9.2 ± 0.2                     | 9.4 ± 0.3*   |
| Na (mEq/L)    | 149 ± 2        | 148 ± 1                       | 148 ± 1     | 149 ± 1                       | 151 ± 2      |
| K (mEq/L)     | 5.5 ± 0.3      | 5.1 ± 0.3                     | 5.5 ± 0.5   | 5.0 ± 0.5                     | 5.3 ± 0.8    |
| Cl (mEq/L)    | 112 ± 1        | 111 ± 2                       | 111 ± 01    | 114 ± 2                       | 115 ± 1      |

Female BALB/c mice were injected intravenously with LNP-formulated *Fluc* mRNA, *hOTC* mRNA (0.3 or 1.0 mg/kg), or saline on days 0, 7 and 14. Blood was collected by cardiac puncture from fed mice on day 15. AST, aspartate aminotransferase; ALT, alanine aminotransferase; ALP, alkaline phosphatase; T-Bil, total bilirubin; UN, urea nitrogen; CRNN, creatinine; T-P, total protein; Alb, albumin; Glo, globulin; A/G, albumin-globulin ratio; Glu, Glucose; T-Cho, total cholesterol; TG, triglyceride; Ca, calcium; Na, sodium; K, potassium; Cl, chloride. Data were analyzed by the Kruskal–Wallis test, followed by Dunn's multiple comparisons tests. Values are expressed as means ± SD. \* indicates  $p < 0.05$  compared with the saline-treated group.

**Table S3: List of antibodies and reagents used for immunocytochemical and immunohistochemical studies.**

| <b>Reagents</b>                                            | <b>Cat#</b> | <b>Clone#</b> | <b>Vendor (city/town, state, country)</b>            | <b>Dilution rate</b> |
|------------------------------------------------------------|-------------|---------------|------------------------------------------------------|----------------------|
| <b>Immunocytochemistry</b>                                 |             |               |                                                      |                      |
| Mouse anti-human OTC monoclonal antibody                   | TA802590    | OTI2G6        | OriGene (Rockville, MD, USA)                         | ×200                 |
| Rabbit anti-VDAC1 and VDAC2 antibody                       | ab154856    |               | Abcam (Cambridge, UK)                                | ×1000                |
| Alexa Fluor 488-conjugated goat anti-mouse IgG (H+L)       | A11029      |               | Thermo Fisher Scientific (Waltham, MA, USA)          | ×1000                |
| Alexa Fluor 555-conjugated goat anti-rabbit IgG (H+L)      | A21429      |               | Thermo Fisher Scientific                             | ×1000                |
| <b>Immunohistochemistry</b>                                |             |               |                                                      |                      |
| Mouse anti-human OTC monoclonal antibody                   | TA802590    | OTI2G6        | OriGene                                              | ×100                 |
| Rabbit anti-prohibitin polyclonal antibody                 | 70R-5543    |               | Fitzgerald Industries International (Acton, MA, USA) | ×200                 |
| Biotinylated goat anti-rabbit IgG                          | BA-1000     |               | Vector Laboratory (Newark, CA, USA)                  | ×400                 |
| Alexa Fluor 647-conjugated streptavidin                    | S21374      |               | Thermo Fisher Scientific                             | ×400                 |
| Alexa Fluor 594-conjugated goat anti-mouse IgG (H+L)       | A32742      |               | Thermo Fisher Scientific                             | ×400                 |
| Biotin conjugated mouse anti-human OTC monoclonal antibody | TA802590AM  | OTI2G6        | OriGene                                              | ×100                 |
| Alexa Fluor 594-conjugated streptavidin                    | S11227      |               | Thermo Fisher Scientific                             | ×400                 |
| Goat anti-mouse serum albumin polyclonal antibody          | ab19194     |               | Abcam                                                | ×400                 |
| Alexa Fluor 647-conjugated chicken anti-goat IgG (H+L)     | A21469      |               | Thermo Fisher Scientific                             | ×400                 |
| 4',6-diamidino-2-phenylindole (DAPI)                       | 40043       |               | Biotium (Fremont, CA, USA)                           | ×10000               |

**Table S4: Main ingredients of normal and high-protein diets.**

| Nutritional content             | Normal (MF) | High-protein diet<br>(40%/kcal) |
|---------------------------------|-------------|---------------------------------|
| Water (g)                       | 7.9         | 9.0                             |
| Crude protein (g)               | 23.1        | 36.6                            |
| Crude fat (g)                   | 5.1         | 7.1                             |
| Crude ash (g)                   | 5.8         | 3.2                             |
| Crude fiber (g)                 | 2.8         | 5.0                             |
| Nitrogen free extract (NFE) (g) | 55.3        | 39.1                            |
| Total (g)                       | 100.0       | 100.0                           |
| Calorie (kcal)                  | 359.5       | 366.6                           |
| Protein calorie ratio (%/kcal)  | 25.7        | 39.9                            |
| Fat calorie ratio (%/kcal)      | 12.8        | 17.4                            |
| NFE calorie ratio (%/kcal)      | 61.5        | 42.7                            |

Per 100 g diet
